# Supplementary material
Source: Research Square preprint supplement (doi:10.21203/rs.3.rs-9162404/v1)
Supplement: Supplementary file 1 [file 2ac702067ea4859a5e82fa4c.doc]

**Table 1. Sequence analysis results by using BLAST confirmation with US NCBI with similar accession number**

| **Name of species isolates** | **Strains** | **Accession number** | **Accession Length**  **(bp)** | **Query cover**  **(%)** | **E values** | **Percent identify**  **(%)** | **Accession Length**  **(bp)** | **Similarity NCBI Accession number** |
| --- | --- | --- | --- | --- | --- | --- | --- | --- |
| ***Diarrhegma modestum* Fab.**  **(Diptera: Tephritidae)** | **DM1** | **PQ198000.1** | **682 bp** | 96 | 0.0 | 99.24 | 658 | PV245203.1 |
| 96 | 0.0 | 99.24 | 658 | PV245016.1 |
| 96 | 0.0 | 98.33 | 657 | PV245295.1 |
| 94 | 0.0 | 97.82 | 642 | PV245173.1 |
| 89 | 0.0 | 98.85 | 612 | MK559395.1 |
| 96 | 0.0 | 88.58 | 657 | MT763888.1 |
| 96 | 0.0 | 88.43 | 657 | MT763887.1 |
| 99 | 0.0 | 87.78 | 678 | MH998943.1 |

**Table 2. Morphometrics of *Diarrhegma modestum* Fab. (Male adult) from dead log of ber tree (*Ziziphus mauritiana* L.)**

| **S.No** | **Characters** | **Range (mm)** | **Mean  Std (mm)** |
| --- | --- | --- | --- |
| 1 | **Antenna** |  |  |
|  | Length | 0.53- 0.38 | 0.46  0.05 |
| 2 | **Head** |  |  |
|  | Length | 1.52- 1.26 | 1.36  0.09 |
|  | Width | 1.59- 1.43 | 1.51  0.06 |
| 3 | **Thorax** |  |  |
|  | Length | 1.56- 1.28 | 1.42  0.09 |
|  | Width | 1.43- 1.10 | 1.23  0.08 |
| 4 | **Leg** |  |  |
|  | Fore leg | 3.21- 2.95 | 3.09  0.08 |
|  | Mid leg | 3.47- 3.21 | 3.31  0.09 |
|  | Hind leg | 3.62- 3.42 | 3.51  0.07 |
| 5 | **Wing** |  |  |
|  | Length | 3.99- 3.77 | 3.87  0.07 |
|  | Width | 1.53- 1.33 | 1.43  0.07 |
| 6 | **Abdomen** |  |  |
|  | Length | 1.94- 1.72 | 1.83  0.06 |
|  | Width | 1.89- 1.73 | 1.80  0.06 |
| 7 | **Whole body** |  |  |
|  | Length | 5.28- 5.03 | 5.16  0.09 |
|  | Wing expanse | 5.09- 4.85 | 4.95  0.07 |

*n=10 replications were taken for morphometric analysis

**Table 3. Morphometrics of *Diarrhegma modestum* Fab. (Female adult) from dead log of ber tree (*Ziziphus mauritiana* L.)**

| **S.No** | **Characters** | **Range (mm)** | **Mean  Std (mm)** |
| --- | --- | --- | --- |
| 1 | **Antenna** |  |  |
|  | Length | 0.69- 0.54 | 0.62  0.05 |
| 2 | **Head** |  |  |
|  | Length | 1.69- 1.43 | 1.54  0.08 |
|  | Width | 1.81- 1.63 | 1.71  0.07 |
| 3 | **Thorax** |  |  |
|  | Length | 1.74- 1.46 | 1.59  0.10 |
|  | Width | 1.58- 1.32 | 1.43  0.09 |
| 4 | **Leg** |  |  |
|  | Fore leg | 3.32- 3.12 | 3.21  0.06 |
|  | Mid leg | 3.63- 3.35 | 3.49  0.09 |
|  | Hind leg | 3.59- 3.51 | 3.56  0.03 |
| 5 | **Wing** |  |  |
|  | Length | 4.19- 3.86 | 4.02  0.09 |
|  | Width | 1.76- 1.62 | 1.67  0.05 |
| 6 | **Abdomen** |  |  |
|  | Length | 2.05- 1.84 | 1.92  0.07 |
|  | Width | 2.11- 1.79 | 1.90  0.09 |
| 7 | **Whole body** |  |  |
|  | Length | 6.55- 6.33 | 6.41  0.06 |
|  | Wing expanse | 5.56- 5.28 | 5.41  0.09 |
| 8 | **Ovipositor** |  |  |
|  | Length | 0.36- 0.26 | 0.31  0.03 |

*n=10 replications were taken for morphometric analysis

**Table 4. Eigen analysis of correlation matrix in *D. modestum* male adult characters**

| **Characters** | **PCA1** | **PCA2** | **PCA3** |
| --- | --- | --- | --- |
| **Eigen values** | 3.621 | 2.808 | 2.229 |
| **Percentage of variance** | 25.865 | 20.057 | 15.922 |
| **Cumulative percentage of variance** | 25.865 | 45.923 | 61.845 |
| **Contribution features (Variables)** | **Loadings** | | |
| Antenna length | 0.634 | -0.103 | -0.606 |
| Head length | 0.675 | -0.121 | -0.253 |
| Head width | 0.403 | 0.052 | -0.165 |
| Thorax length | 0.457 | 0.665 | -0.386 |
| Thorax width | 0.945 | -0.230 | 0.222 |
| Fore leg length | -0.454 | 0.197 | -0.585 |
| Mid leg length | -0.059 | 0.573 | 0.480 |
| Hind leg length | 0.595 | 0.491 | 0.185 |
| Wing length | -0.600 | 0.151 | 0.471 |
| Wing width | -0.032 | 0.919 | 0.075 |

**Table 5. Eigen analysis of correlation matrix in *D. modestum* female adult characters**

| **Characters** | **PCA1** | **PCA2** | **PCA3** |
| --- | --- | --- | --- |
| **Eigen values** | 4.004 | 3.265 | 2.401 |
| **Percentage of variance** | 26.694 | 21.767 | 16.219 |
| **Cumulative percentage of variance** | 26.694 | 48.462 | 64.468 |
| **Contribution features (Variables)** | **Loadings** | | |
| Antenna length | 0.578 | -0.376 | 0.270 |
| Head length | 0.233 | -0.740 | 0.324 |
| Head width | -0.562 | 0.014 | 0.780 |
| Thorax length | -0.519 | -0.296 | -0.346 |
| Thorax width | 0.148 | -0.775 | -0.355 |
| Fore leg length | 0.501 | 0.503 | 0.042 |
| Mid leg length | 0.586 | -0.520 | 0.370 |
| Hind leg length | 0.508 | 0.228 | 0.538 |
| Wing length | 0.452 | 0.620 | -0.258 |
| Wing width | 0.121 | 0.831 | 0.013 |
