# Supplementary material
Source: Research Square preprint supplement (doi:10.21203/rs.3.rs-9162404/v1)
Supplement: Supplementary file 2 [file 9262f91226f7a9af38f29692.doc]

| 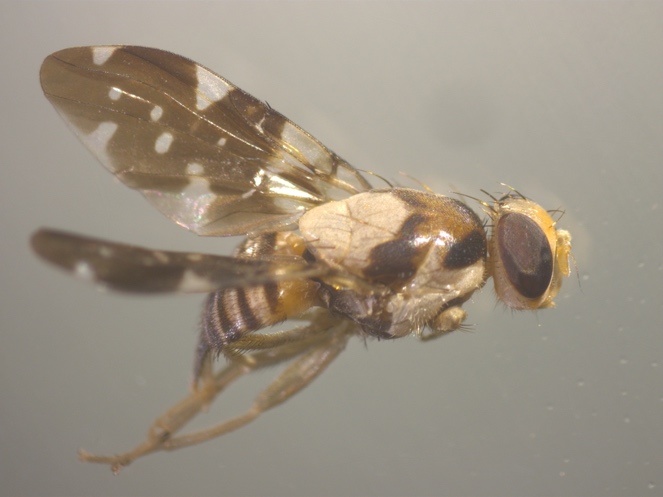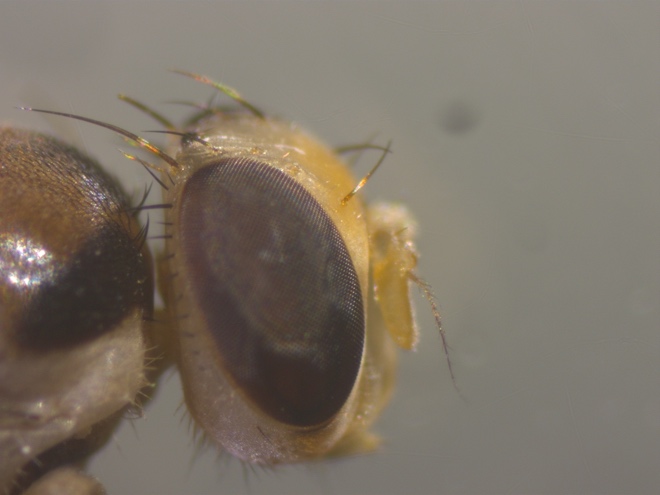 | 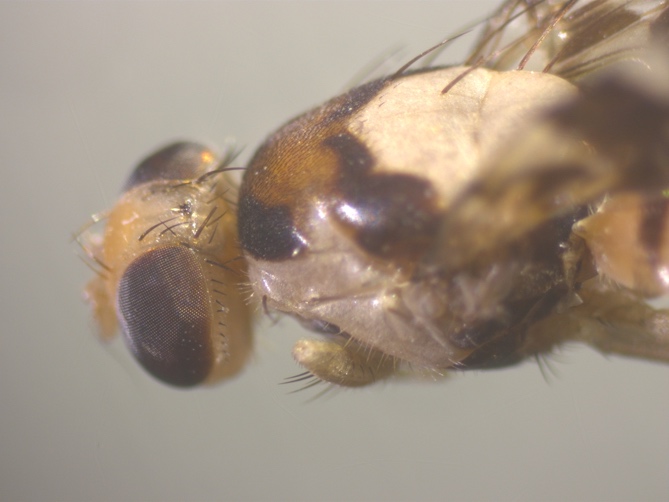 |
| --- | --- |
|  | 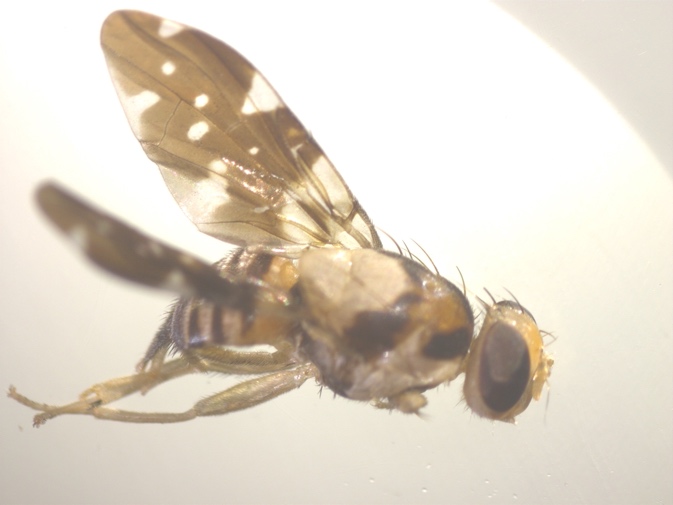 |
| 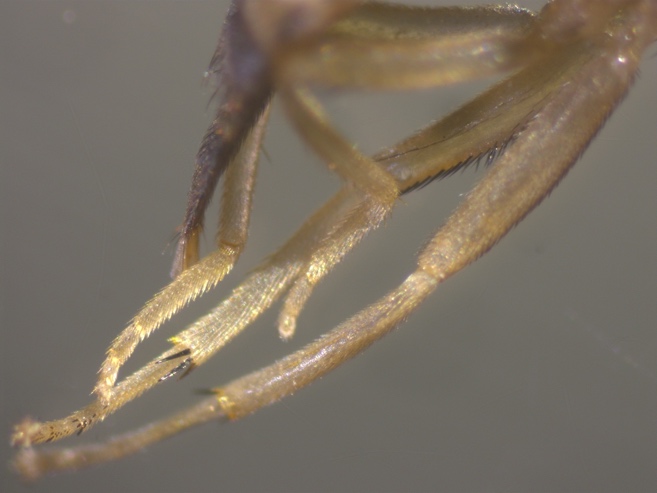 | 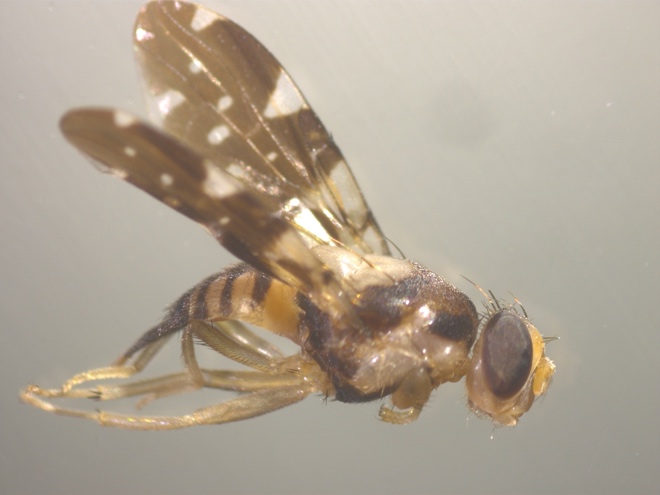 |
| **Figure 1. Morphological characteristics of adult specimens of the west Indian cherry fruit fly, *D. modestum* (Tephritidae; Diptera)** | |

|  |
| --- |
| **Figure 2. Biplot loading of principal components showing the relationship among the various characters of male *D. modestum*** |
|  |
| **Figure 3. Individual principal components loading to showing the relationship among the replications of male *D. modestum*** |

|  |  |
| --- | --- |
| **Figure 4. Biplot loading of principal components showing the relationship among the various characters of female *D. modestum*** |  |
|  |  |
| **Figure 5. Individual principal components loading to showing the relationship among the replications of female *D. modestum*** |  |
|  | |
| **Figure 6. Biplot and individual loading of principal components to show the relationship between both male and female characters of *D. modestum*** | |
|  | |
| **Figure 7. Individual loading of principal components to form K means clustering of adult characters of *D. modestum*** | |

|  |
| --- |
| **Figure 8. Heatmap analysis for morphometric trait clustering relationship among various characters of *D. modestum*** |
| **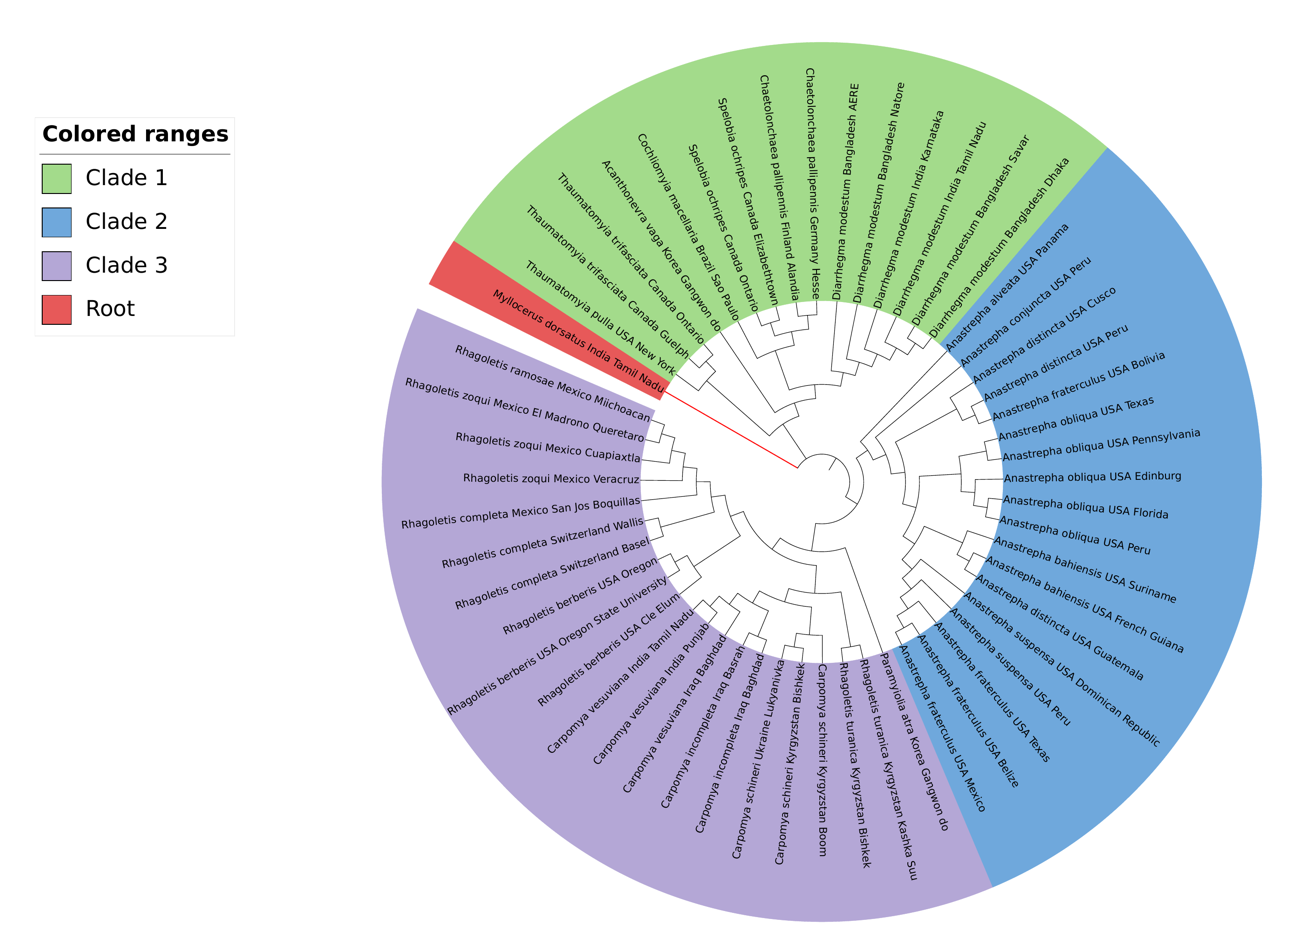** |
| **Figure 9. Phylotree showing the relationship among different genus related to**  ***D. modestum*** |
